# Supplementary material for: Nanostructured ternary perovskite oxides as photoconversion efficiency enhancers for DSSC
Source: Royal Society of Chemistry journal article supplement (doi:10.1039/d1tc04584a), 2021-12-09
Supplement: d1tc04584a1.pdf [file d1tc04584a1.pdf]

# Nanostructured ternary perovskite oxides as photoconversion efficiency enhancers for DSSC

Nandarapu Purushotham Reddy<sup>a</sup>, Rompivalsa Santhosh<sup>b</sup>, Suresh Thogiti<sup>b</sup>, Reddivari.

Muniramaiah<sup>a</sup>, D. Paul Joseph<sup>a\*</sup>, Banavoth Murali<sup>b\*</sup>

<sup>a</sup>Department of Physics, National Institute of Technology, Warangal, 506004, India

<sup>b</sup>Solar cells and Photonics Research Laboratory, School of Chemistry, University of Hyderabad, Hyderabad-500046, Telangana, India

\*Corresponding author e-mail: murali.banavoth@uohyd.ac.in and paul@nitw.ac.in

*XRD analysis:*

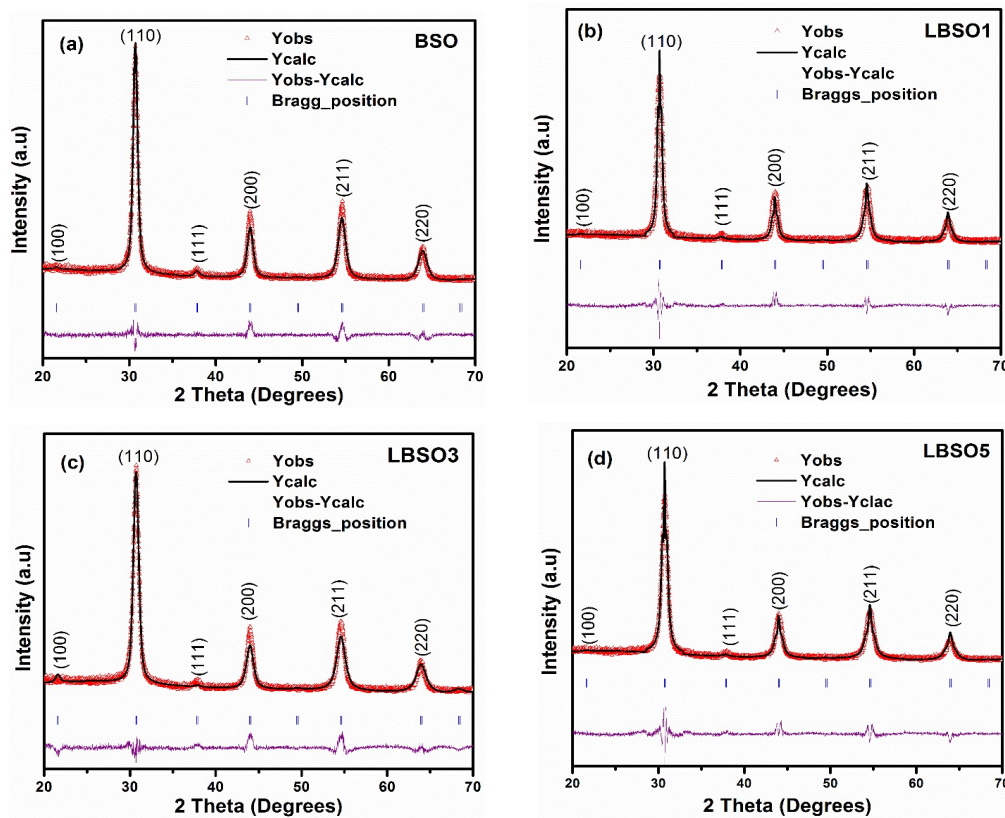

**Fig. S1:** Rietveld of (a) BSO, (b) LBSO1, LBSO5 nanocrystalline

**Table S1:** Dye loading BaSnO<sub>3</sub> electrodes.

| Device ID     | Dye loading ( $\epsilon \times 10^5 \text{ M}^{-1}\text{cm}^{-1}$ ) |
|---------------|---------------------------------------------------------------------|
| TCL/BSO/TCL   | 0.254                                                               |
| TCL/LBSO1/TCL | 0.275                                                               |
| TCL/LBSO3/TCL | 0.296                                                               |
| TCL/LBSO5TCL  | 0.262                                                               |

refinement XRD analysis (c) LBSO3 and (d) samples.

values of all the La doped

*Mott-Schottky plot and Energy level bands of La doped BaSnO<sub>3</sub>:*

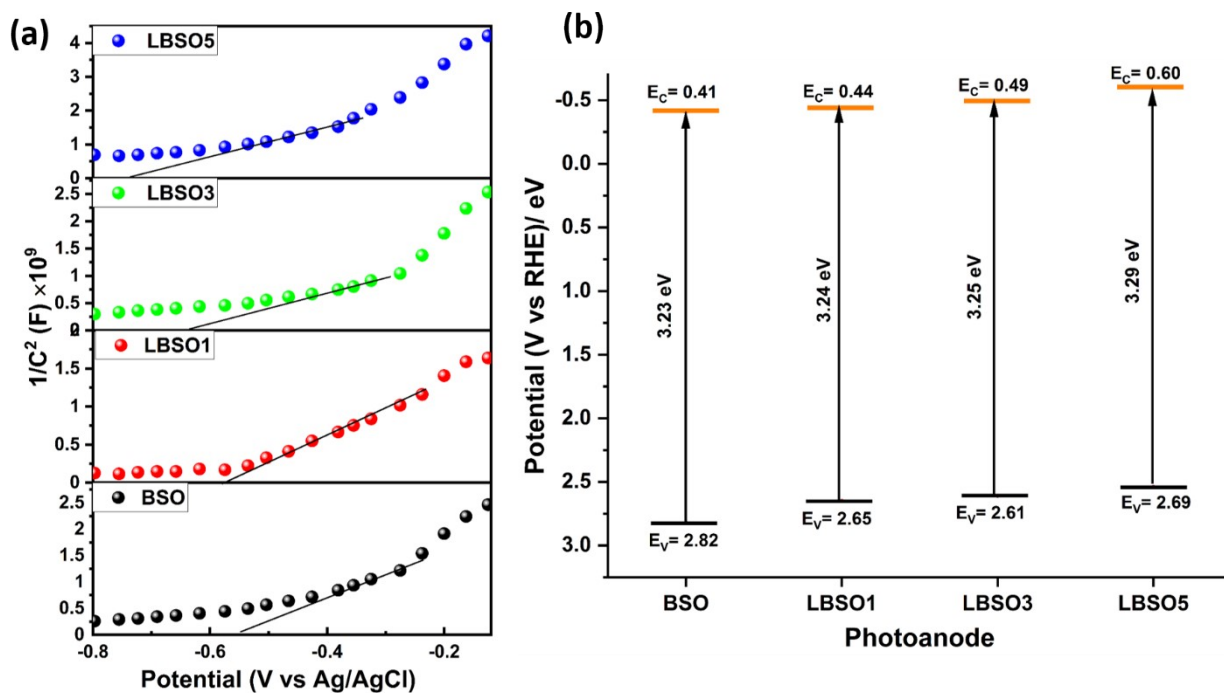

**Fig. S2.** (a) Mott-Schottky curves and (b) Band band level alignment of  $\text{Ba}_{1-x}\text{La}_x\text{SnO}_3$  ( $x = 0$  to  $0.05$ ) electrodes.

*XPS analysis:*

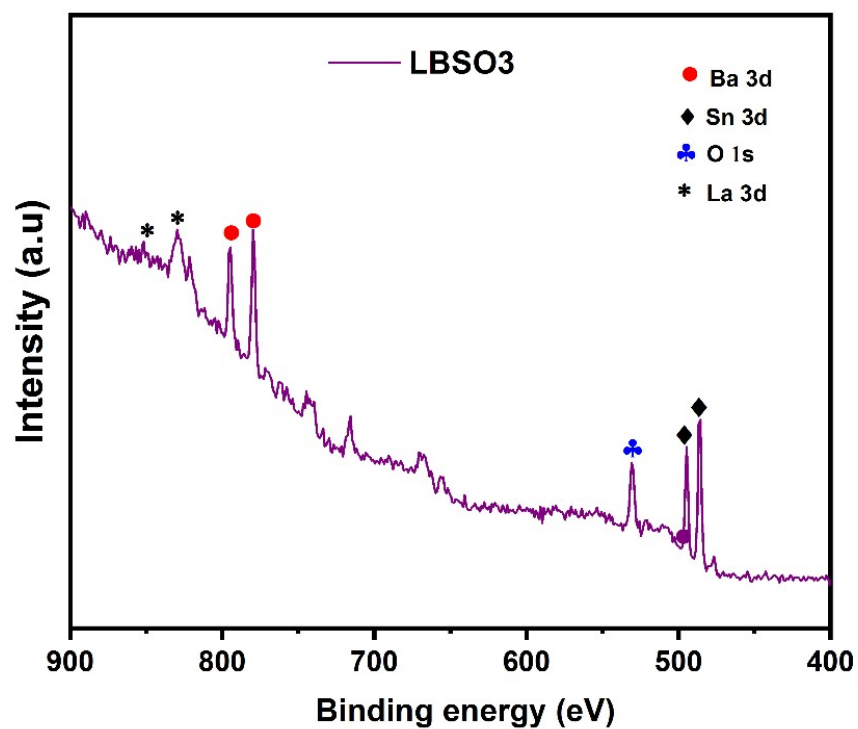

**Fig. S3.** The XPS survey spectrum of nanostructured LBSO3 sample.

*I-V characteristics:*

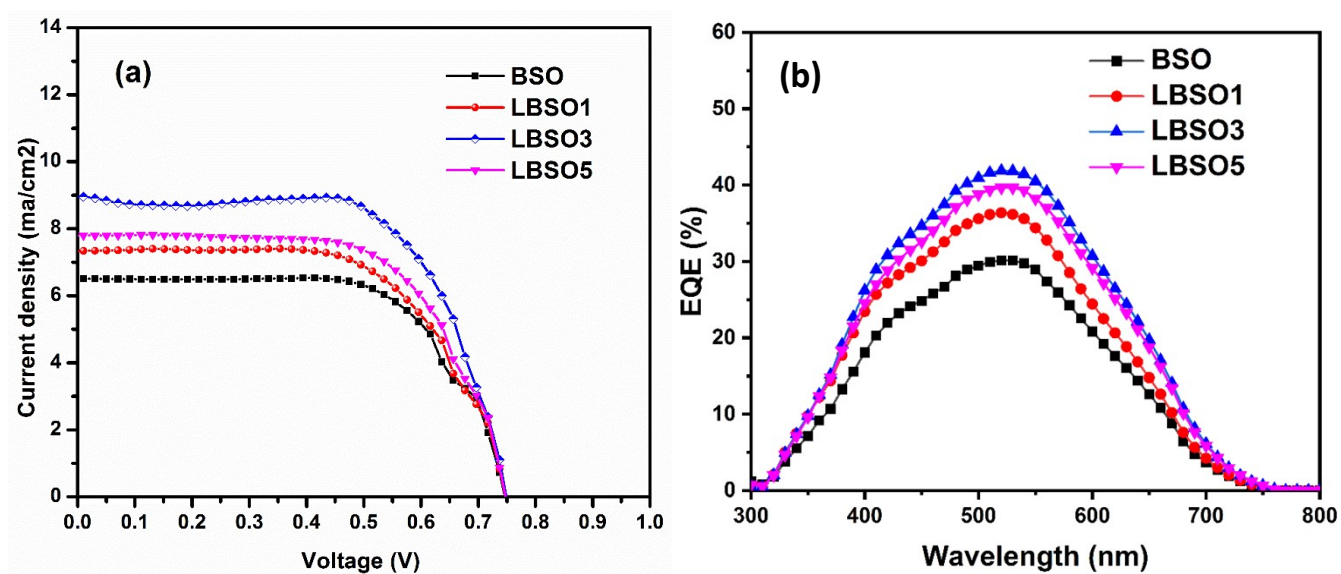

**Fig. S4.** (a) Photocurrent density-voltage (J-V) curves of DSSCs fabricated with pre TiCl<sub>4</sub> treated

| Device | V <sub>oc</sub> | J <sub>sc</sub>       | FF  | η   |
|--------|-----------------|-----------------------|-----|-----|
| Name   | (V)             | (mA/cm <sup>2</sup> ) | (%) | (%) |

BSO and LBSO<sub>x</sub> (x = 1, 3, and 5) used as photoanodes, (b) External quantum efficiency (EQE) measurements of BSO and LBSO samples.

**Table S2:** The current density-voltage (J-V) parameters of pre TiCl<sub>4</sub> treated nanostructured BSO and LBSO<sub>x</sub> (x = 1, 3, and 5) photo anode based DSSC devices.

|                    |       |                                                                |                                                                        |      |
|--------------------|-------|----------------------------------------------------------------|------------------------------------------------------------------------|------|
| TCL/BSO            | 0.737 | 6.50                                                           | 67.42                                                                  | 3.23 |
| TCL/LBSO1          | 0.738 | 7.33                                                           | 64.23                                                                  | 3.48 |
| TCL/LBSO3          | 0.742 | 8.95                                                           | 65.73                                                                  | 4.37 |
| <b>Device name</b> |       | <b>Charge collection efficiency (<math>\eta_{cc}</math> %)</b> | <b>Charge injection efficiency (<math>-\Delta G_{inj}</math>) (eV)</b> |      |
| TCL/LBSO5          | 0.739 | 7.79                                                           | 65.36                                                                  | 3.76 |
| TCL/BSO/TCL        |       | 51.59                                                          | 0.40                                                                   |      |
| TCL/LBSO1/TCL      |       | 55.47                                                          | 0.37                                                                   |      |
| TCL/LBSO3/TCL      |       | 59.92                                                          | 0.32                                                                   |      |
| TCL/LBSO5/TCL      |       | 53.24                                                          | 0.21                                                                   |      |

**Table S3:** The charge collection ( $\eta_{cc}$  %) and injection ( $\Delta G_{inj}$ ) efficiency values of pre and post surface treated photoanodes based devices.

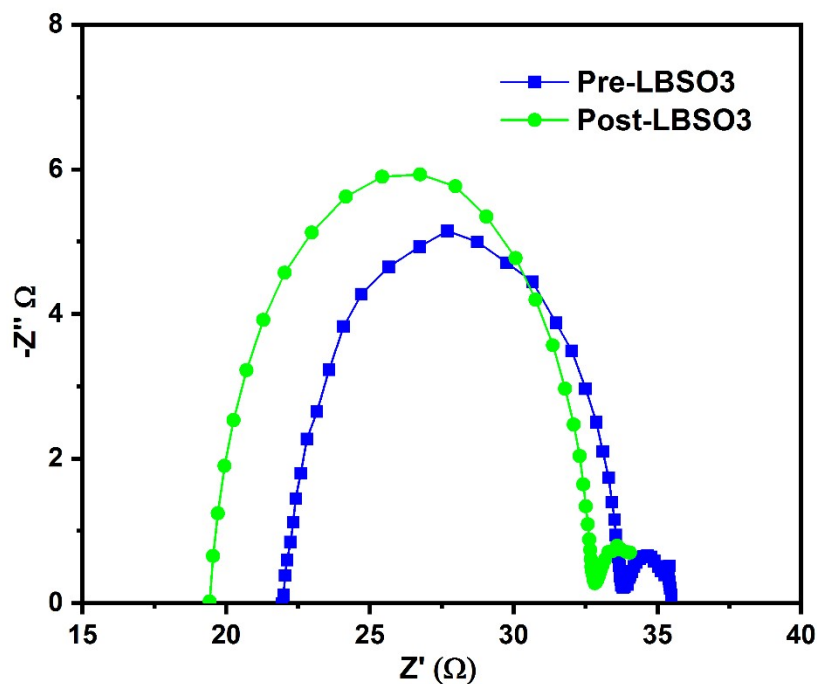

**Fig. S5:** The comparison of Nyquist plot of fabricated DSSC cells using pre and post treated LBSO<sub>3</sub> (TCL/LBSO<sub>3</sub> and TCL/LBSO<sub>3</sub>/TCL) photoanodes.
